# Supplementary material
Source: MDPI journal article supplement (https://www.mdpi.com/2073-4433/15/5/589)
Supplement: s1 [file s1]

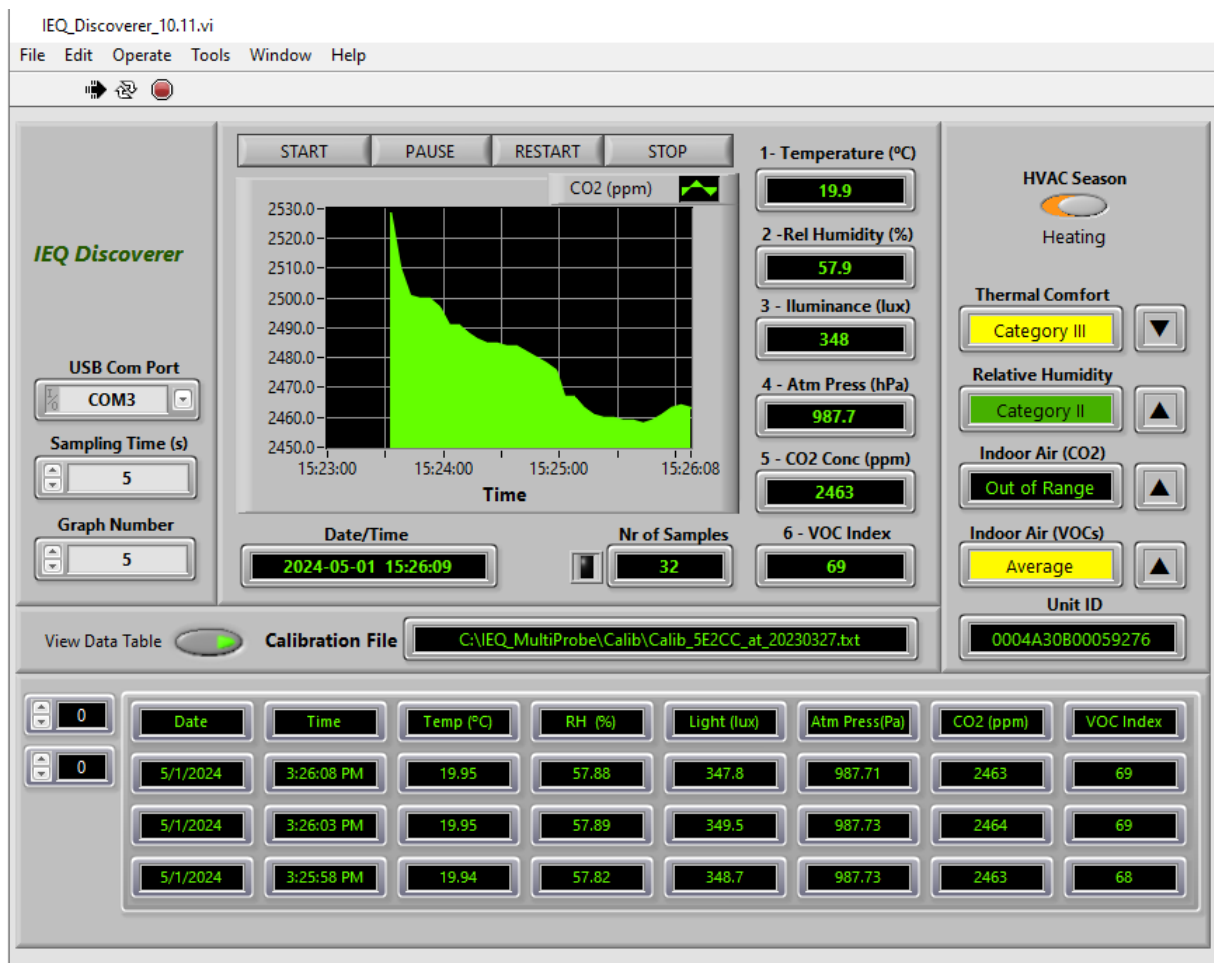

Figure S1. A computer screenshot showing a typical IEQ data logger display interface

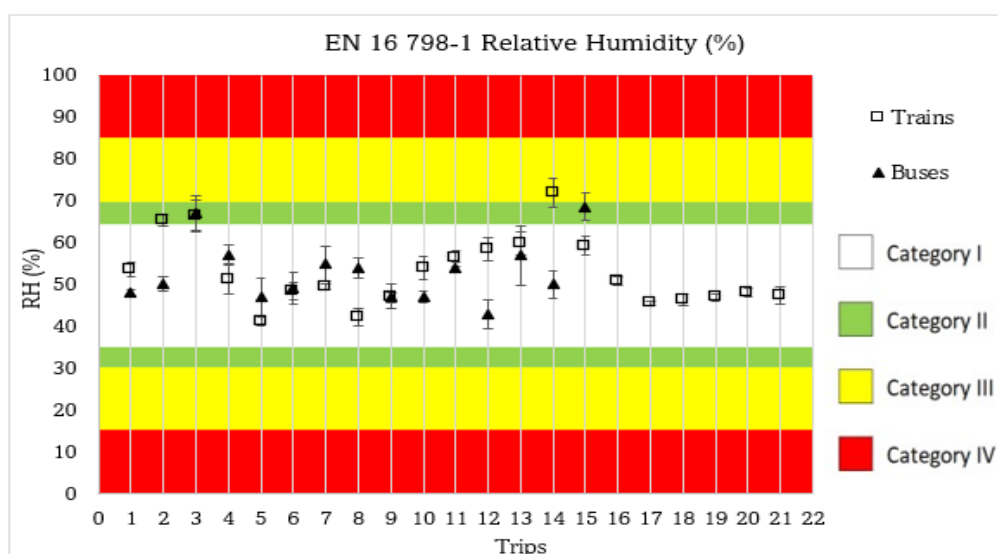

Figure S2. Relative humidity time series for bus and train trips combined.

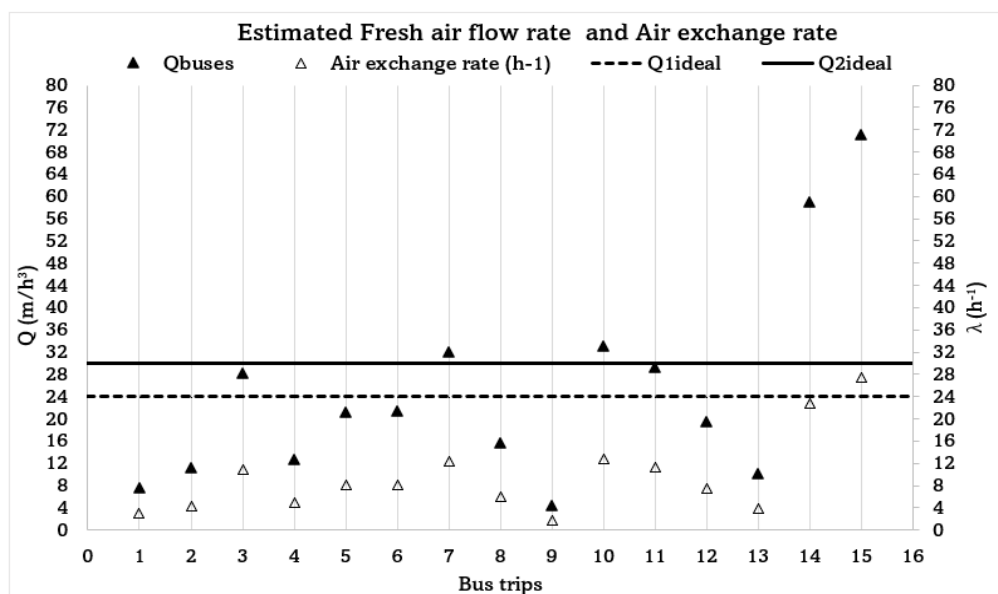

Figure S3. Fresh air flow rate and Air exchange rate for all investigated bus trips.

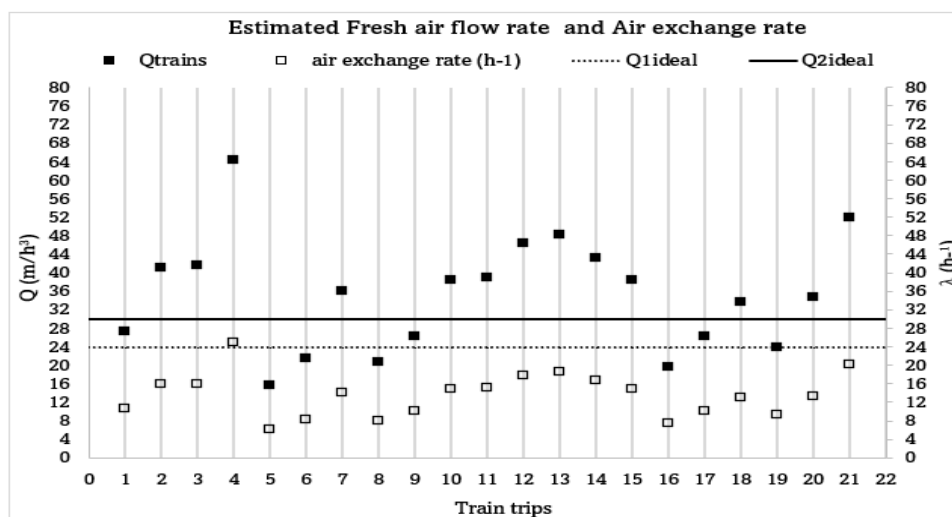

Figure S4. Fresh air flow rate and Air exchange rate for all investigated train trips

**Table S1.** Ventilation parameters in all trips.

| <b>Trips</b> | <b>Q1<sub>ideal</sub></b> | <b>Q2<sub>ideal</sub></b> | <b><math>\lambda</math>1<sub>ideal</sub></b> | <b><math>\lambda</math>2<sub>ideal</sub></b> | <b>TCV</b> | <b>TPC</b> | <b>Q<sub>trains</sub></b> | <b><math>\lambda</math><sub>trains</sub></b> | <b>BCV</b> | <b>BPC</b> | <b>Q<sub>buses</sub></b> | <b><math>\lambda</math><sub>buses</sub></b> |
|--------------|---------------------------|---------------------------|----------------------------------------------|----------------------------------------------|------------|------------|---------------------------|----------------------------------------------|------------|------------|--------------------------|---------------------------------------------|
| 1            | 24                        | 30                        | 13                                           | 16.5                                         | 145.6      | 58         | 27                        | 10                                           | 60         | 56         | 8                        | 3                                           |
| 2            | 24                        | 30                        | 13                                           | 16.5                                         | 145.6      | 48         | 41                        | 16                                           | 60         | 56         | 11                       | 4                                           |
| 3            | 24                        | 30                        | 13                                           | 16.5                                         | 145.6      | 48         | 41                        | 16                                           | 60         | 56         | 28                       | 11                                          |
| 4            | 24                        | 30                        | 13                                           | 16.5                                         | 145.6      | 58         | 64                        | 25                                           | 60         | 56         | 13                       | 5                                           |
| 5            | 24                        | 30                        | 13                                           | 16.5                                         | 145.6      | 52         | 15                        | 6                                            | 60         | 56         | 21                       | 8                                           |
| 6            | 24                        | 30                        | 13                                           | 16.5                                         | 145.6      | 74         | 21                        | 8                                            | 60         | 56         | 21                       | 8                                           |
| 7            | 24                        | 30                        | 13                                           | 16.5                                         | 145.6      | 74         | 36                        | 14                                           | 60         | 56         | 32                       | 12                                          |
| 8            | 24                        | 30                        | 13                                           | 16.5                                         | 145.6      | 74         | 20                        | 8                                            | 60         | 56         | 16                       | 6                                           |
| 9            | 24                        | 30                        | 13                                           | 16.5                                         | 145.6      | 52         | 26                        | 10                                           | 9.5        | 9          | 4                        | 2                                           |
| 10           | 24                        | 30                        | 13                                           | 16.5                                         | 145.6      | 58         | 38                        | 15                                           | 9.5        | 9          | 33                       | 13                                          |
| 11           | 24                        | 30                        | 13                                           | 16.5                                         | 145.6      | 58         | 39                        | 15                                           | 60         | 56         | 29                       | 11                                          |
| 12           | 24                        | 30                        | 13                                           | 16.5                                         | 145.6      | 48         | 46                        | 18                                           | 9.5        | 9          | 20                       | 8                                           |
| 13           | 24                        | 30                        | 13                                           | 16.5                                         | 145.6      | 48         | 48                        | 18                                           | 9.5        | 9          | 10                       | 4                                           |
| 14           | 24                        | 30                        | 13                                           | 16.5                                         | 145.6      | 48         | 43                        | 17                                           | 9.5        | 9          | 59                       | 23                                          |
| 15           | 24                        | 30                        | 13                                           | 16.5                                         | 145.6      | 58         | 38                        | 15                                           | 9.5        | 9          | 71                       | 27                                          |
| 16           | 24                        | 30                        | 13                                           | 16.5                                         | 145.6      | 52         | 19                        | 7                                            |            |            |                          |                                             |
| 17           | 24                        | 30                        | 13                                           | 16.5                                         | 145.6      | 52         | 26                        | 10                                           |            |            |                          |                                             |
| 18           | 24                        | 30                        | 13                                           | 16.5                                         | 145.6      | 52         | 33                        | 13                                           |            |            |                          |                                             |
| 19           | 24                        | 30                        | 13                                           | 16.5                                         | 145.6      | 52         | 24                        | 9                                            |            |            |                          |                                             |
| 20           | 24                        | 30                        | 13                                           | 16.5                                         | 145.6      | 48         | 34                        | 13                                           |            |            |                          |                                             |
| 21           | 24                        | 30                        | 13                                           | 16.5                                         | 145.6      | 58         | 52                        | 20                                           |            |            |                          |                                             |
